# Supplementary material for: Remote loading of curcumin-in-modified β-cyclodextrins into liposomes using a transmembrane pH gradient
Source: Royal Society of Chemistry journal article supplement (doi:10.1039/c9ra07560g), 2019-01-01
Supplement: c9ra07560g1.pdf [file c9ra07560g1.pdf]

## Supplementary Data

Remote loading of Curcumin-in-modified  $\beta$ -cyclodextrins into liposomes through transmembrane pH gradient

Fadwa Odeh<sup>1,#,\*</sup>, Hamdi Nsairat<sup>1,#</sup>, Walhan Alshaer<sup>2,#,\*</sup>, Shrouq Alsotari<sup>2</sup>, Rula Buqaien<sup>2</sup>, Said Ismail<sup>3,4</sup>, Abdalla Awidi<sup>2,3</sup>, Abeer Al Bawab<sup>1,5</sup>

<sup>1</sup>Department of Chemistry, The University of Jordan, Amman, Jordan.

<sup>2</sup>Cell Therapy Center, The University of Jordan, Amman, Jordan.

<sup>3</sup>Faculty of Medicine, The University of Jordan, Amman, Jordan.

<sup>4</sup>Qatar Genome Project, Qatar Foundation, Doha, Qatar.

<sup>5</sup>HMCSR, The University of Jordan, Amman, Jordan.

# Authors contributed equally to this work

### \*Corresponding Authors:

#### Dr. Walhan Alshaer

Cell Therapy Center  
The University of Jordan  
Amman 11942, Jordan.  
Office : (+962) 6-5355000 Ext. : 23960  
Mobile:(+962) 790823678  
E-mail: [walhan.alshaer@ju.edu.jo](mailto:walhan.alshaer@ju.edu.jo)

#### Dr. Fadwa Odeh

Department of Chemistry  
The University of Jordan  
Amman 11942, Jordan.  
Office : (+962) 6-5355000 Ext. :22152  
Mobile : (+962) 792950409  
E-mail:[f.odeh@ju.edu.jo](mailto:f.odeh@ju.edu.jo)

## Legends for Supplementary Fig.s

**Fig. S1** The molecular structure of Curcumin.

**Fig. S2** Conformation structure of  $\beta$ -cyclodextrin.

**Fig. S3** Conformation structure of 6-OTs- $\beta$ CD.

**Fig. S4** Mass spectrum of 6-O-Monosyl-6-deoxy- $\beta$ -cyclodextrin (6- $\beta$ CD OTs) on the negative mode.

**Fig. S5**  $^1\text{H-NMR}$  spectrum of  $\beta$ CD in the  $d_6$ -DMSO solvent.

**Fig. S6**  $^1\text{H-NMR}$  spectrum of 6-OTs- $\beta$ CD in the  $d_6$ -DMSO solvent.

**Fig. S7** The absorption spectra of CRM (0.18 mM),  $\beta$ CD (0.22 mM) and CRM:  $\beta$ CD complex at pH 7 .

**Fig. S8** Absorption spectra of [CRM] = 0.18 mM with increasing concentrations of a)  $\beta$ CD , b) E- $\beta$ CD and c) D- $\beta$ CD from 0.00-0.54 mM.

**Fig. S9** TGA thermograms for a) CRM- $\beta$ CD, b) CRM-E- $\beta$ CD and c) CRM-D- $\beta$ CD.

**Fig. S10**  $^1\text{H-NMR}$  specrums for  $\beta$ CD , CRM and CRM- $\beta$ CD complex in  $d_6$ -DMSO.

**Fig. S11**  $^1\text{H-NMR}$  spectrum for E- $\beta$ CD, CRM and CRM-E $\beta$ CD complex in  $d_6$ -DMSO.

**Fig. S12**  $^1\text{H-NMR}$  spectrum for D- $\beta$ CD, CRM and CRM-D $\beta$ CD complex in  $d_6$ -DMSO.

## Legends for Supplementary Tables

**Table S1** A summary table for DSC exothermic peaks of CRM with different  $\beta$ CD complexes

**Table S2** Chemical shifts ( $\delta$ ) of CRM- $\beta$ CD complexe and their corresponding precursors. where  $\delta_o$ ,  $\delta_c$  and  $\Delta\delta_o$  represent the chemical shifts for free compound, the complex and the chemical shift difference, respectively.

**Table S3** Chemical shifts ( $\delta$ ) of CRM-E- $\beta$ CD complex and their corresponding precursors.

**Table S4** Chemical shifts ( $\delta$ ) of CRM-D- $\beta$ CD complexe and their corresponding precursors.

**Fig. S1**

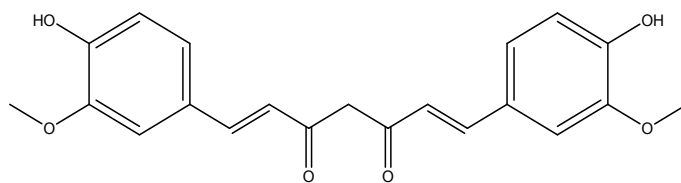

Fig. S2

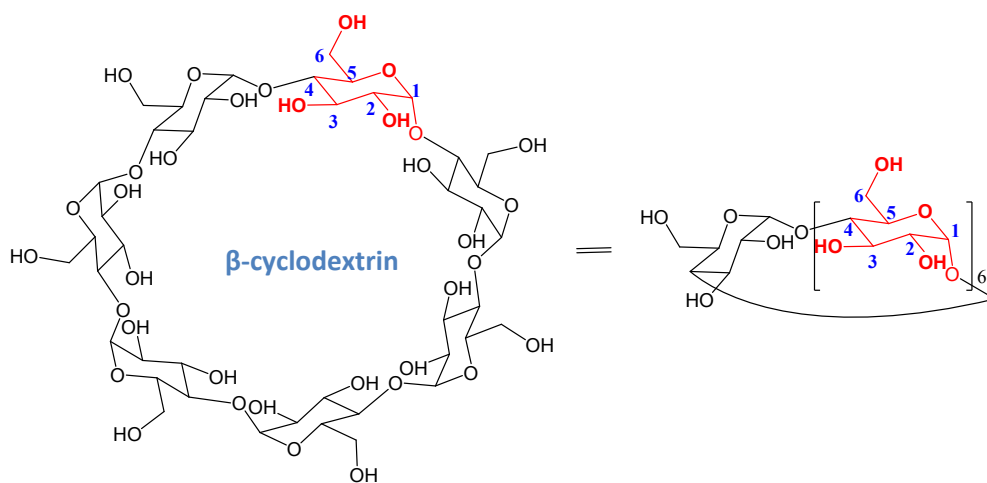

**Fig. S3**

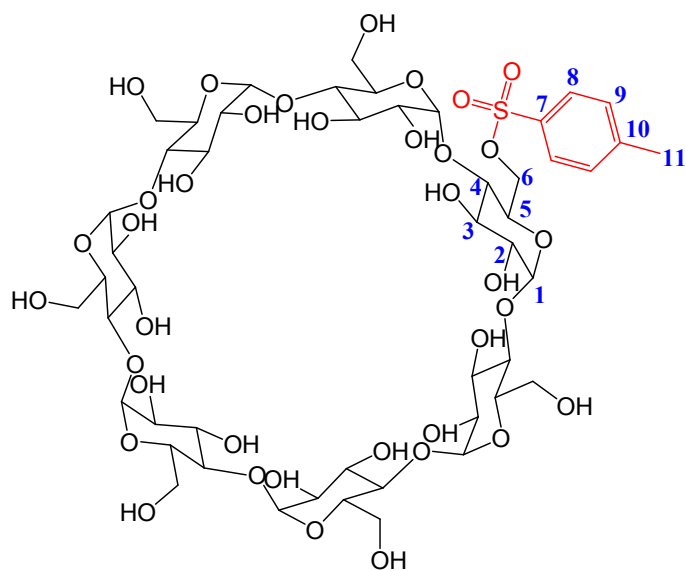

**C<sub>49</sub>H<sub>76</sub>O<sub>37</sub>S**  
**Exact Mass: 1288.3786**

Fig. S4

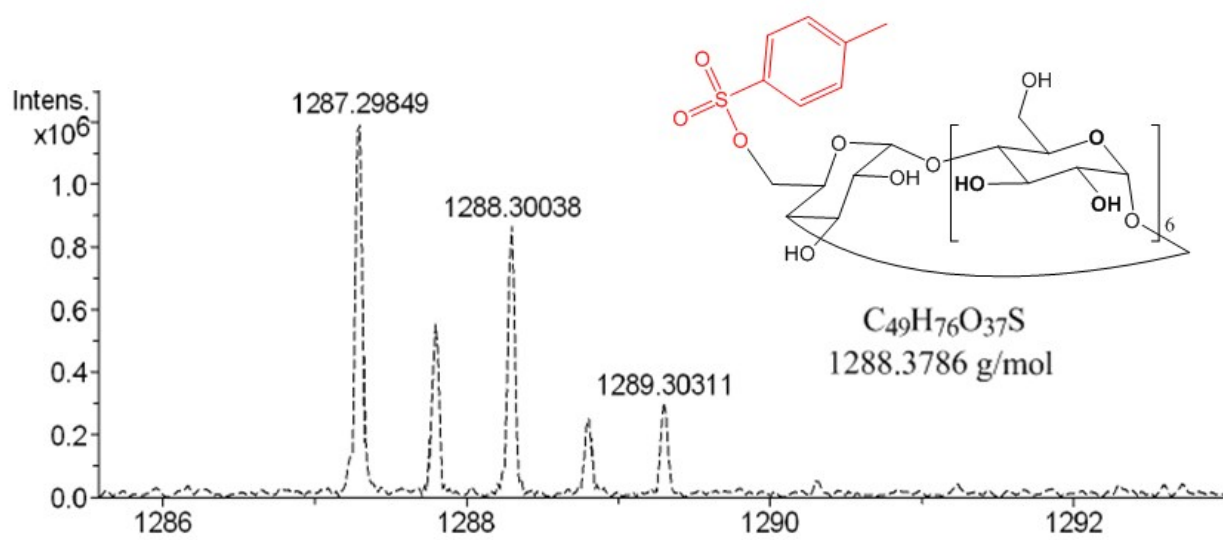

Fig. S5

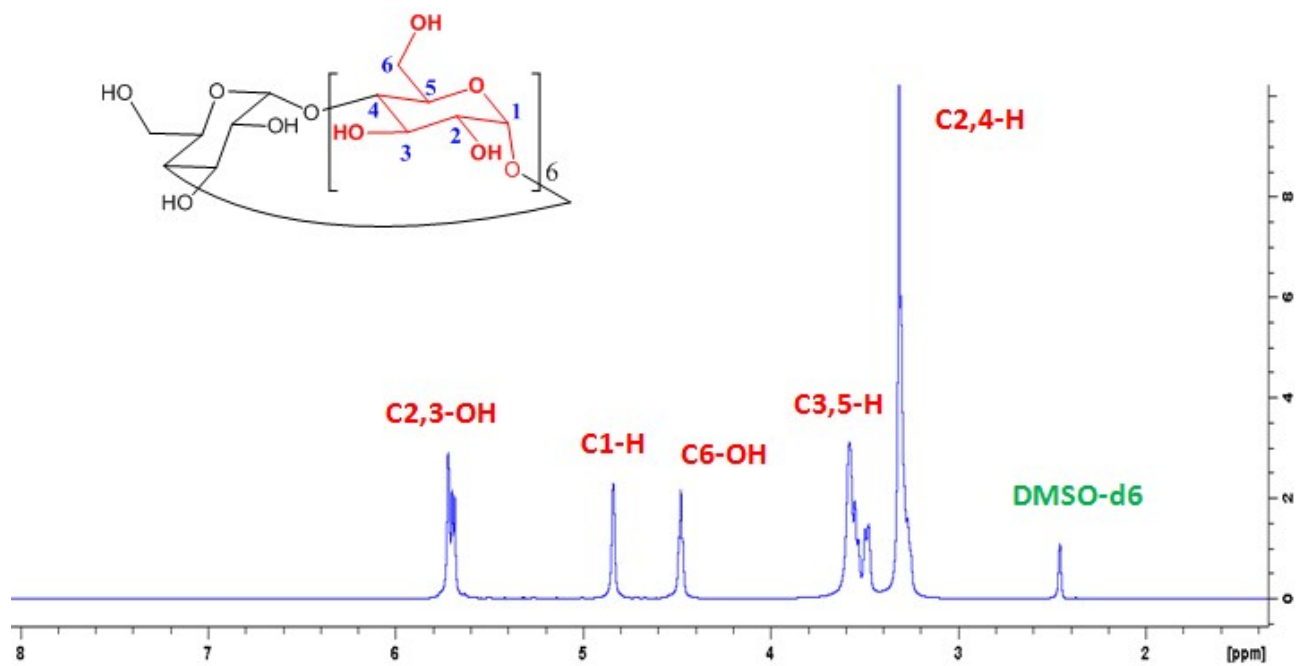

Fig. S6

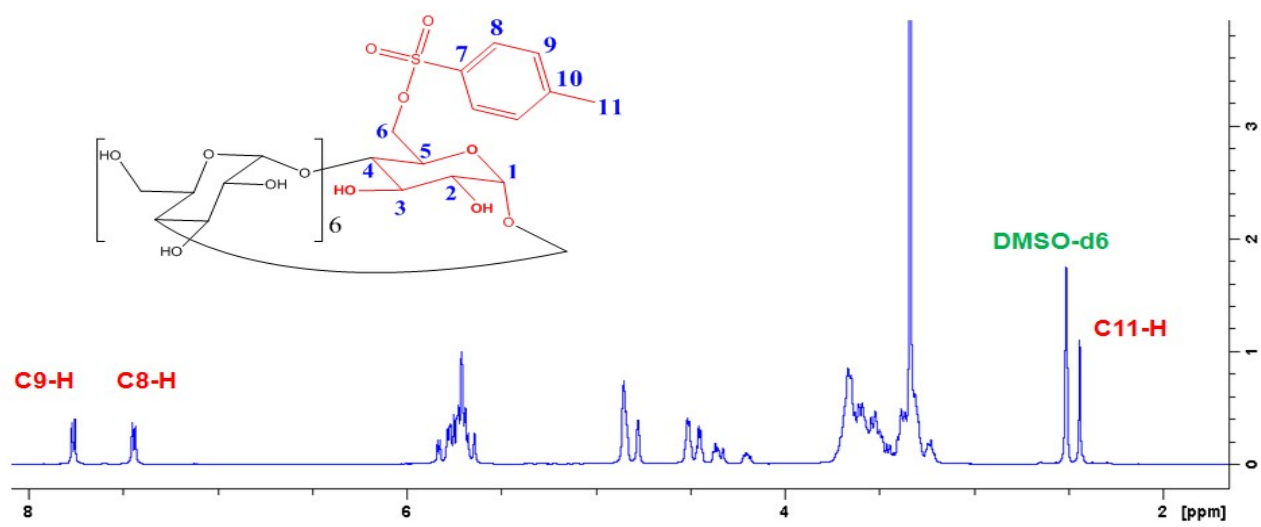



Fig. S7

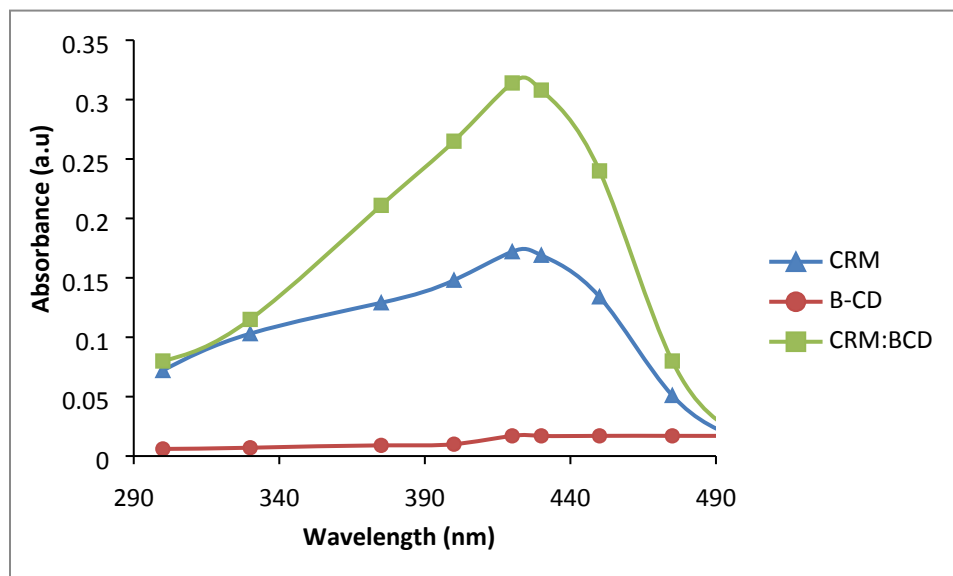

Fig. S8

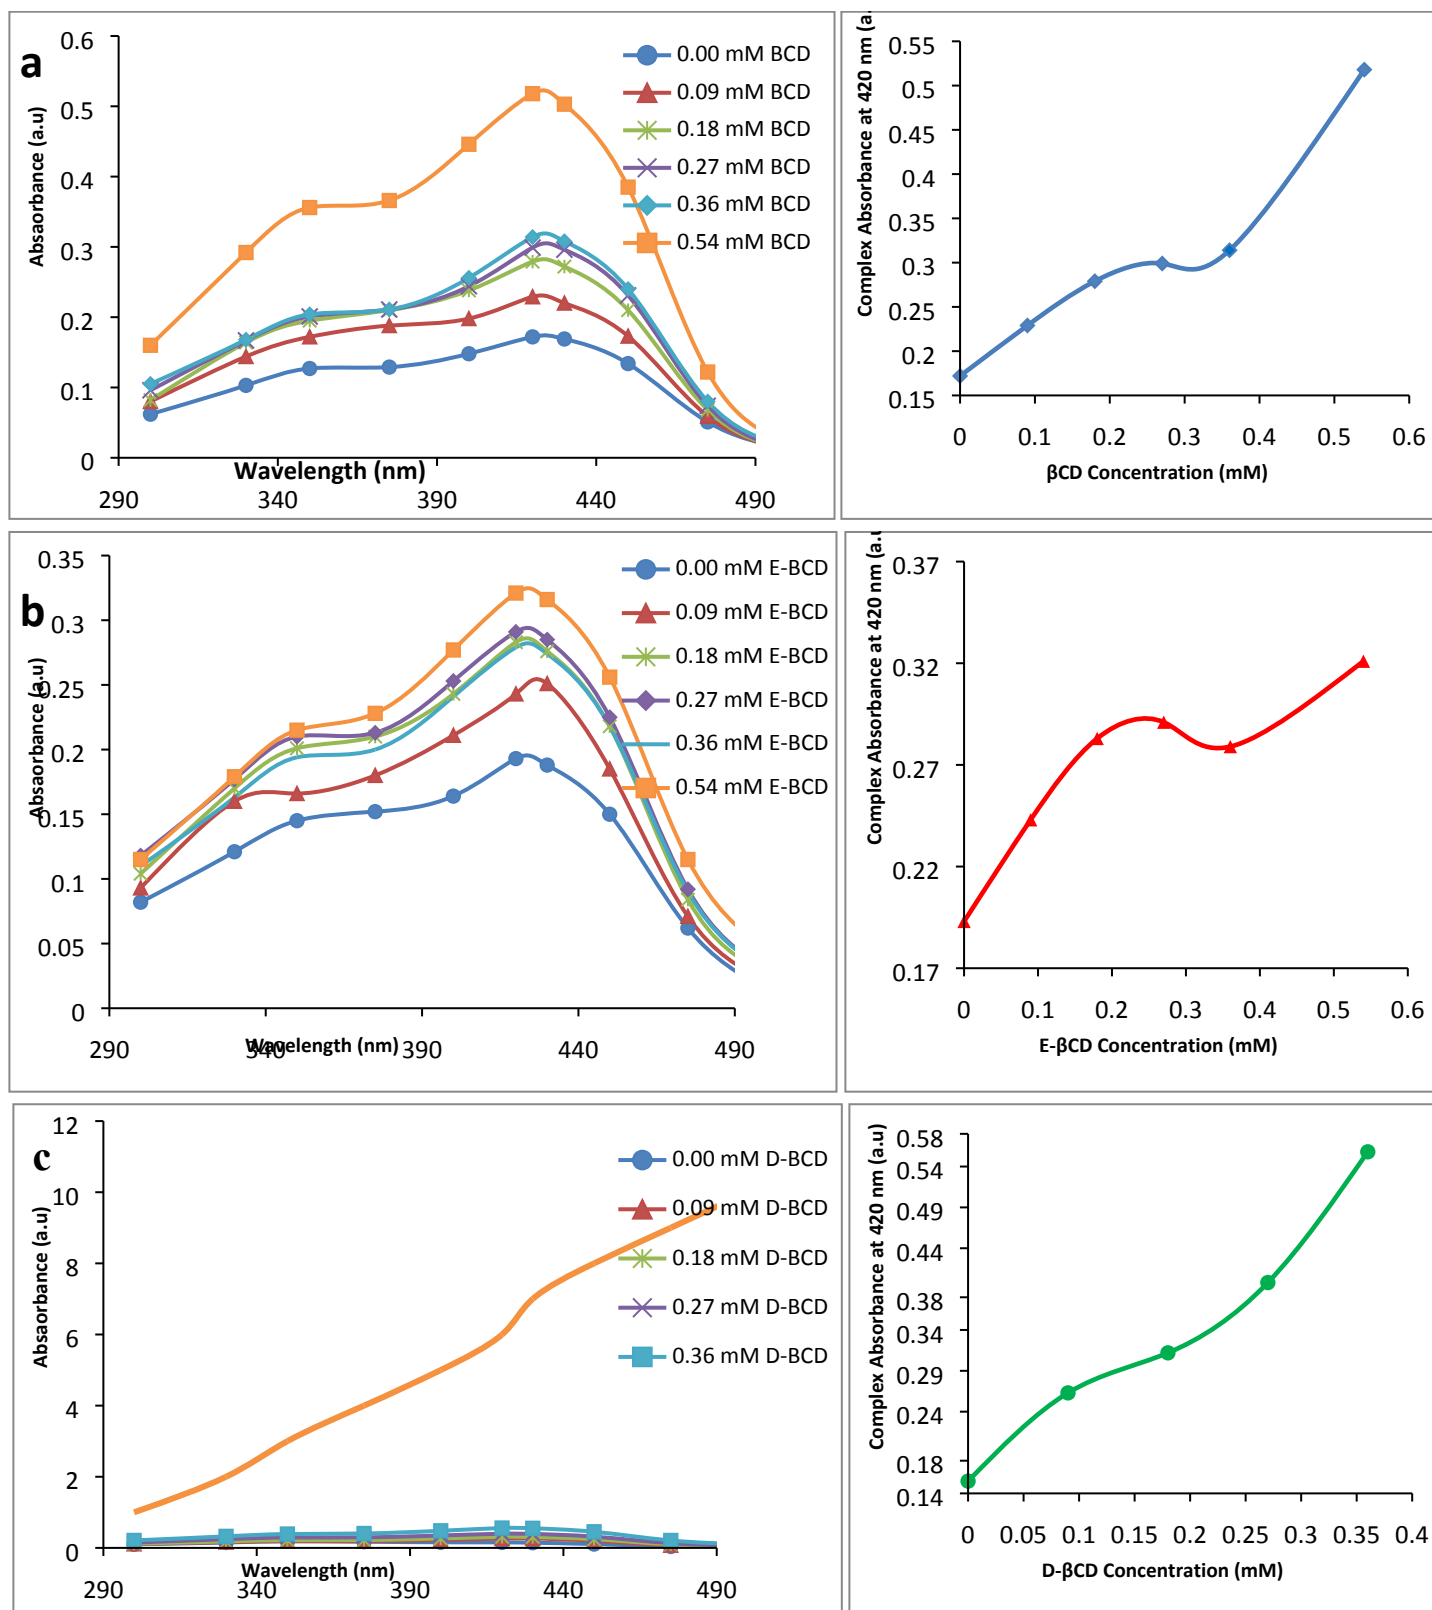

Fig. S9

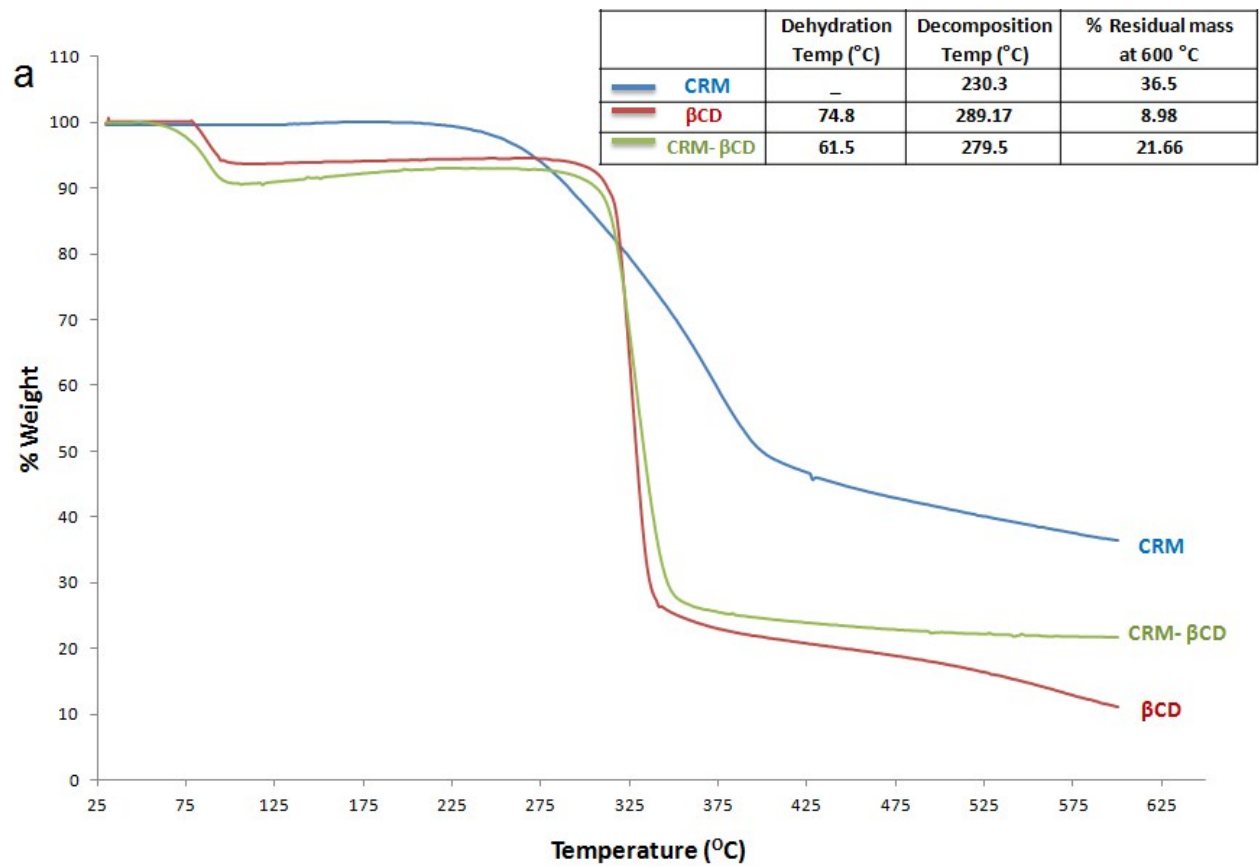

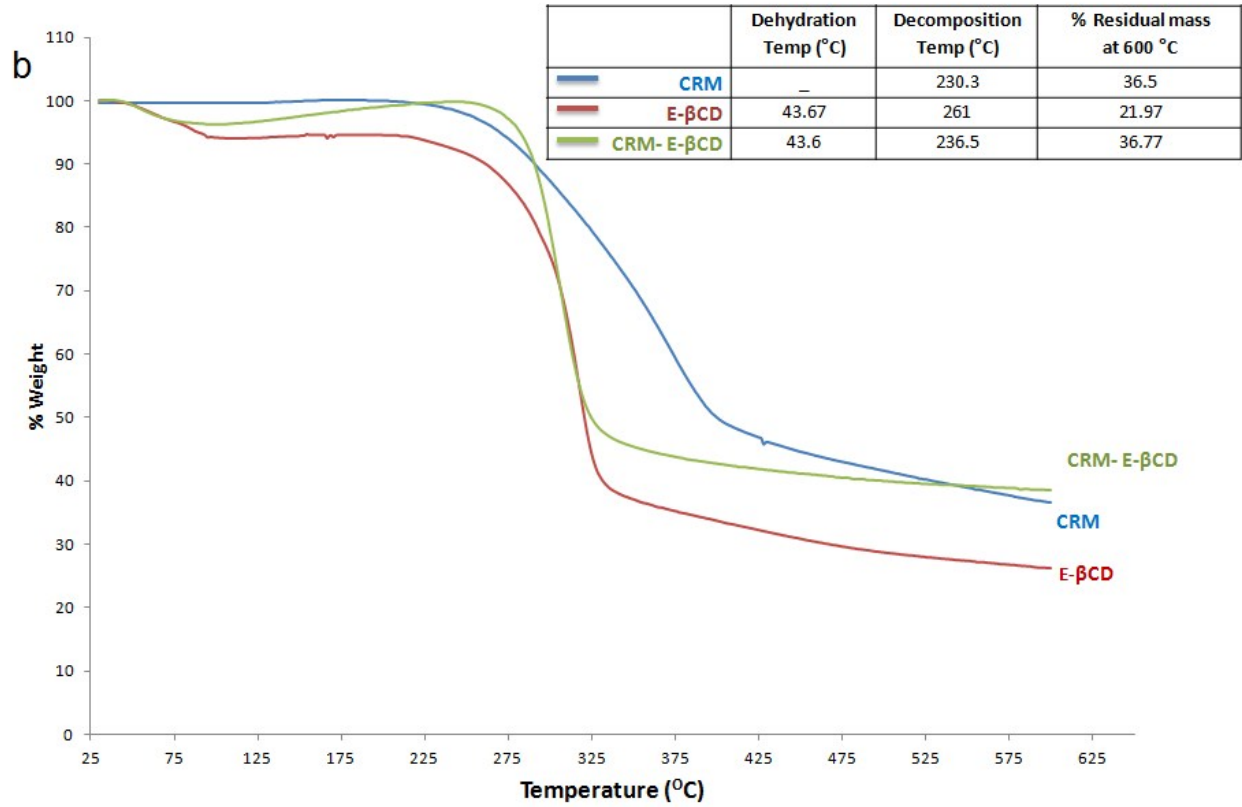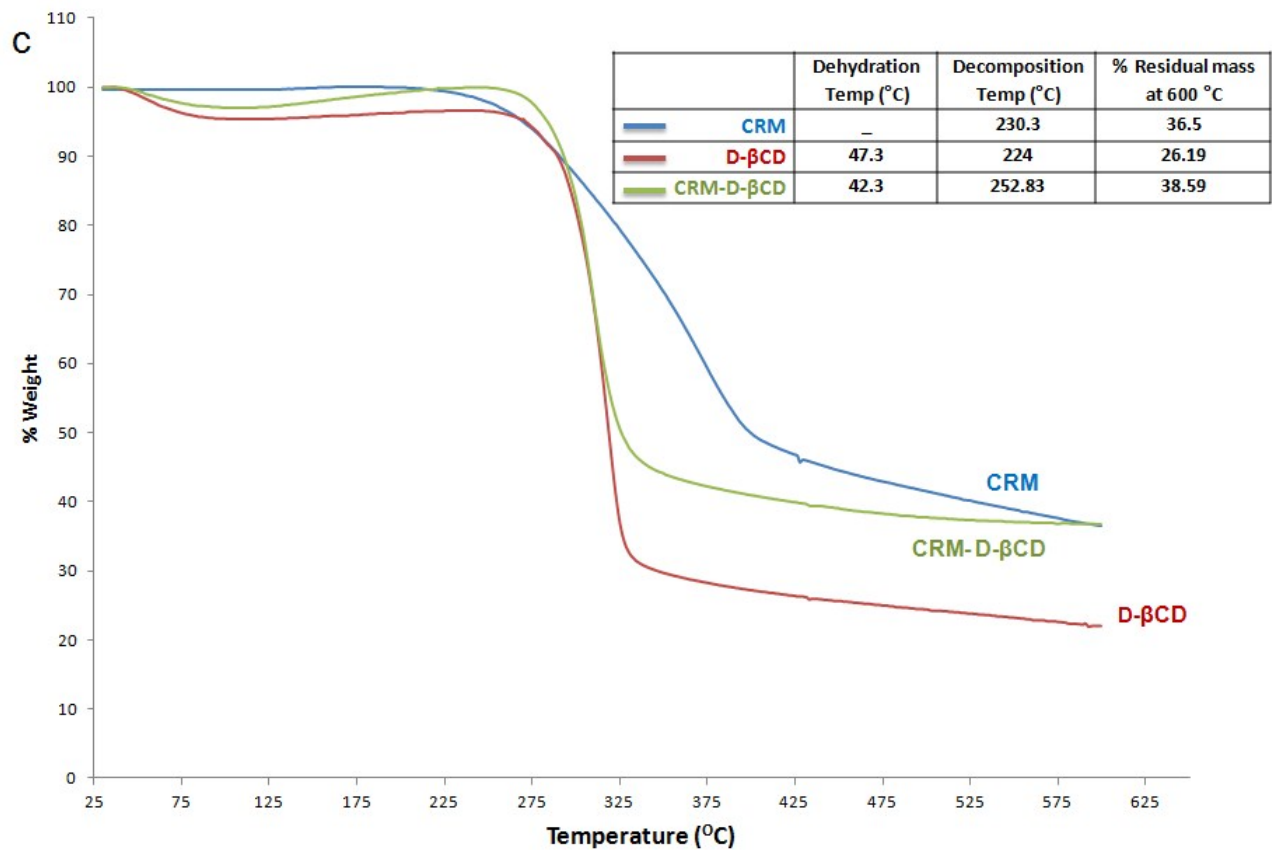

Fig. S10

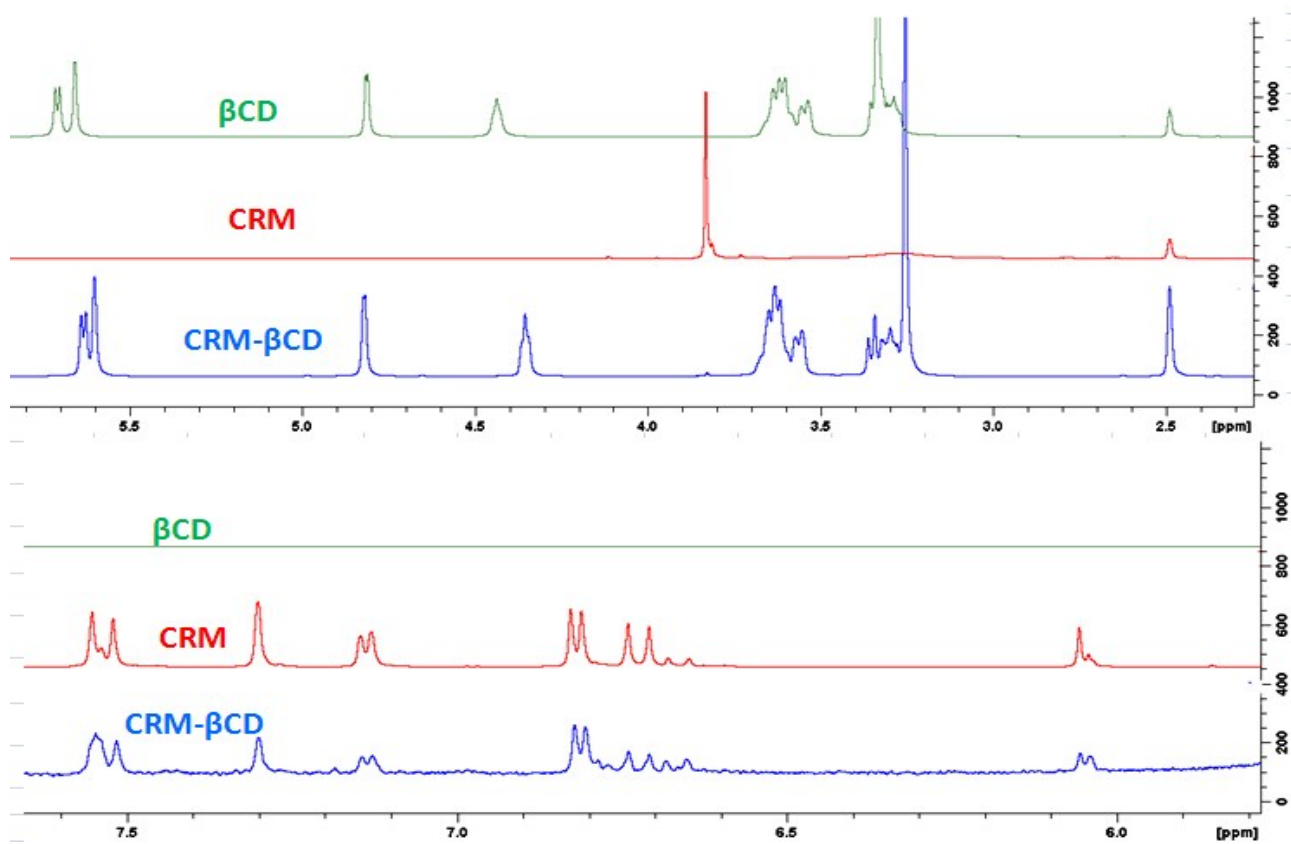

Fig. S11

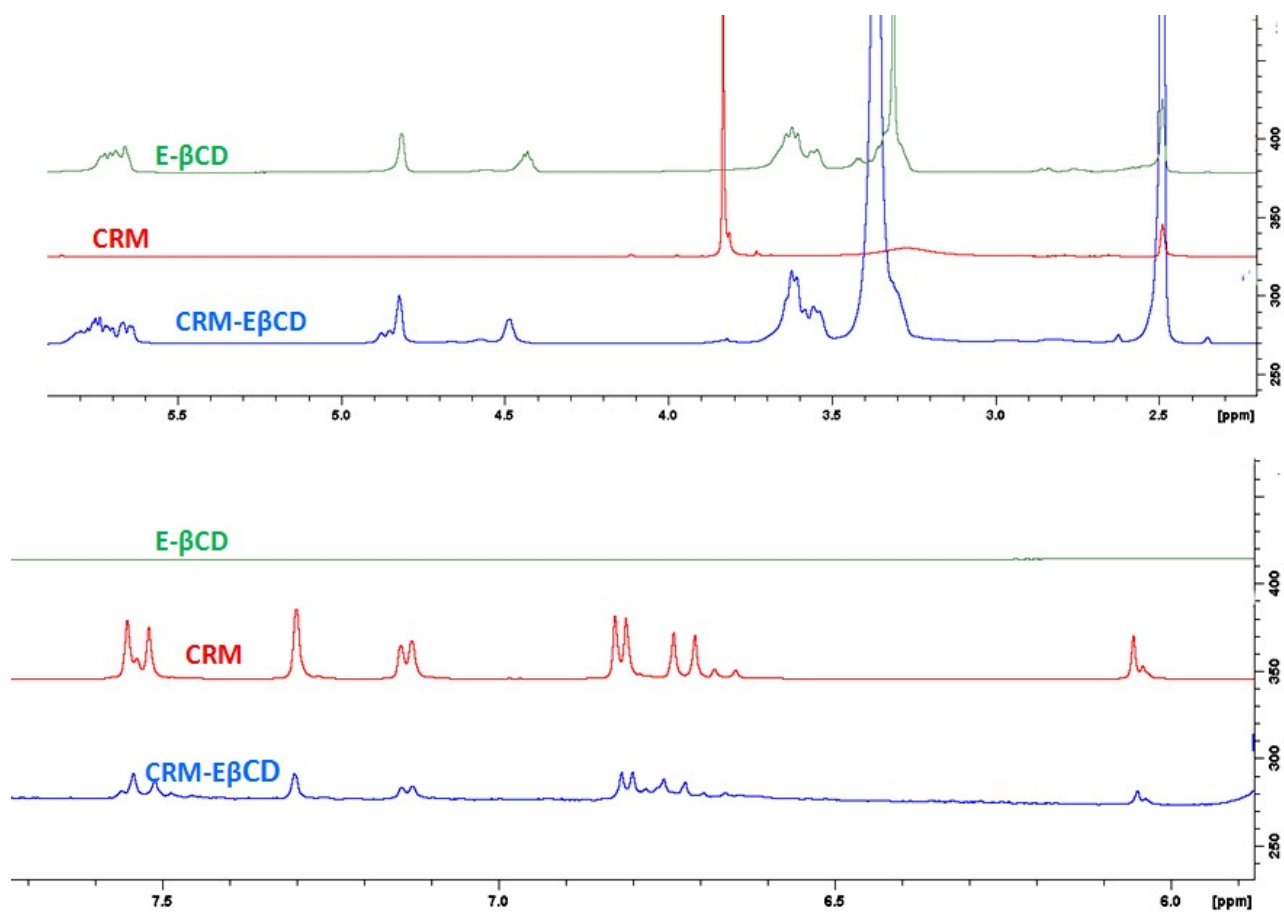

Fig. S12

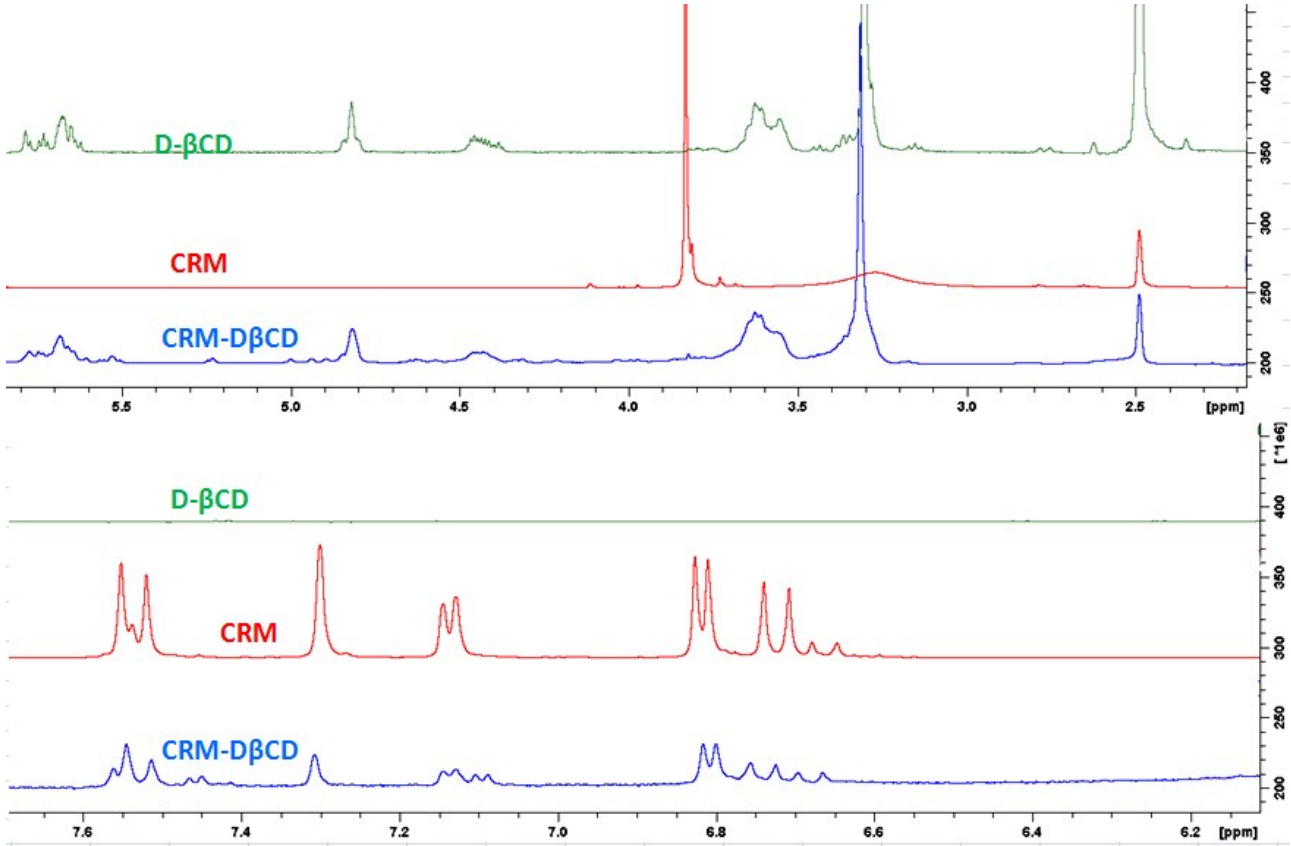

**Table S1**

| No | Sample    | Exothermic peak (°C) |
|----|-----------|----------------------|
| 1  | CRM       | 177.3                |
| 2  | βCD       | 131.6                |
| 3  | E-βCD     | 96.6                 |
| 4  | D-βCD     | 96.0                 |
| 5  | CRM-βCD   | 122.0                |
| 7  | CRM-E-βCD | 93.6                 |
| 6  | CRM-D-βCD | 86.7                 |

**Table S2**

|          | Proton | δ <sub>o</sub> | δ <sub>c</sub> | Δδ <sub>o</sub> |
|----------|--------|----------------|----------------|-----------------|
| βCD      | H1     | 4.4384         | 4.3564         | -0.0820         |
|          | H2     | 3.2887         | 3.2986         | 0.0099          |
|          | H3     | 3.6202         | 3.6331         | 0.0129          |
|          | H4     | 3.3363         | 3.3439         | 0.0076          |
|          | H5     | 3.5462         | 3.5642         | 0.0180          |
| Curcumin | Ha     | 6.0559         | 6.0546         | -0.0013         |
|          | Hb     | 6.8176         | 6.8119         | -0.0057         |
|          | Hc     | 7.5311         | 7.5272         | -0.0039         |
|          | Hd     | 6.6789         | 6.6825         | 0.0036          |
|          | He     | 7.1375         | 7.1350         | -0.0025         |
|          | Hf     | 5.8550         | Not visible    |                 |
|          | Hg     | 3.8329         | 3.8299         | -0.0030         |
|          | Hh     | 7.3013         | 7.2999         | -0.0014         |



**Table S3**

|               | <b>Proton</b> | <b><math>\delta_o</math></b> | <b><math>\delta_c</math></b> | <b><math>\Delta\delta_o</math></b> |
|---------------|---------------|------------------------------|------------------------------|------------------------------------|
| E- $\beta$ CD | H1            | 4.8182                       | 4.8234                       | 0.0052                             |
|               | H2            | 3.2893                       | 3.3146                       | 0.0253                             |
|               | H3            | 3.6223                       | 3.6245                       | 0.0022                             |
|               | H4            | 3.3129                       | 3.3635                       | 0.0506                             |
|               | H5            | 3.5558                       | 3.5448                       | -0.0110                            |
| Curcumin      | Ha            | 6.0559                       | 6.0496                       | -0.0063                            |
|               | Hb            | 6.8180                       | 6.8094                       | -0.0086                            |
|               | Hc            | 7.5524                       | 7.5432                       | -0.0092                            |
|               | Hd            | 6.7398                       | 6.7543                       | 0.0145                             |
|               | He            | 7.1375                       | 7.1364                       | -0.0011                            |
|               | Hf            | 5.8245                       | Not visible                  |                                    |
|               | Hg            | 3.8330                       | 3.8215                       | -0.0115                            |
|               | Hh            | 7.3010                       | 7.3035                       | 0.0025                             |

**Table S4**

|               | <b>Proton</b> | <b><math>\delta_o</math></b> | <b><math>\delta_c</math></b> | <b><math>\Delta\delta_o</math></b> |
|---------------|---------------|------------------------------|------------------------------|------------------------------------|
| D- $\beta$ CD | H1            | 4.8215                       | 4.8197                       | -0.0018                            |
|               | H2            | 3.3046                       | 3.3159                       | 0.0113                             |
|               | H3            | 3.6140                       | 3.6181                       | 0.0041                             |
|               | H4            | 3.3471                       | 3.3615                       | 0.0144                             |
|               | H5            | 3.5550                       | 3.5643                       | 0.0093                             |
| Curcumin      | Ha            | 6.0560                       | 6.0477                       | -0.0083                            |
|               | Hb            | 6.8180                       | 6.8083                       | -0.0097                            |
|               | Hc            | 7.5205                       | 7.5140                       | -0.0065                            |
|               | Hd            | 6.7082                       | 6.7249                       | 0.0167                             |
|               | He            | 7.1373                       | 7.1373                       | 0.0000                             |
|               | Hf            | 5.8551                       | Not visible                  |                                    |
|               | Hg            | 3.8330                       | 3.8245                       | -0.0085                            |
|               | Hh            | 7.3011                       | 7.3077                       | 0.0066                             |
